# Supplementary material for: Physicochemical properties of imidazolium-derived ionic liquids with different C-2 substitutions
Source: Royal Society of Chemistry journal article supplement (doi:10.1039/c1cp22375e), 2011-01-01
Supplement: c1cp22375e.pdf [file c1cp22375e.pdf]

Supporting Information:

### Physicochemical Properties of Imidazolium-derived Ionic Liquids with different C-2 Substitution

Chen Liao<sup>a</sup>, Nan Shao<sup>a</sup>, Kee Sung Han<sup>a</sup>, Xiao-Guang Sun<sup>a,\*</sup>, De-En Jiang<sup>a</sup>,  
Edward W. Hagaman<sup>a</sup>, and Sheng Dai<sup>a,b,\*</sup>

<sup>a</sup> Chemical Sciences Division, Oak Ridge National Laboratory,  
One Bethel Valley Road, Oak Ridge, TN 37831, United States

<sup>b</sup> Department of Chemistry, University of Tennessee,  
Knoxville, Tennessee 37996, United States

\*Author to whom correspondence should be addressed.

X.-G. Sun: e-mail: sunx@ornl.gov, Tel: 1 865 241 8822; FAX: 1 865 576 5235

S. Dai: e-mail: dais@ornl.gov, Tel: 1 865 574 5033; FAX: 1 865 5765235

ST1. Relative energies of three conformers of cation 1.

|                       | C1         | C2         | C3         |
|-----------------------|------------|------------|------------|
| <i>E</i> (Hartree)    | -615.73721 | -615.73721 | -615.73732 |
| $\Delta E$ (kcal/mol) | 0.07       | 0.07       | 0.00       |

ST2. Relative energies of three conformers of cation 2.

|                       | C1         | C2         | C3         |
|-----------------------|------------|------------|------------|
| <i>E</i> (Hartree)    | -422.76525 | -422.76691 | -422.76668 |
| $\Delta E$ (kcal/mol) | 1.04       | 0.00       | 0.14       |

ST3. Relative energies of three conformers of cation 3.

|                       | C1         | C2         | C3         |
|-----------------------|------------|------------|------------|
| <i>E</i> (Hartree)    | -752.65335 | -752.65308 | -752.65324 |
| $\Delta E$ (kcal/mol) | 0.00       | 0.17       | 0.07       |

ST4. Relative energies of three conformers of cation 4.

|                       | C1         | C2         | C3         |
|-----------------------|------------|------------|------------|
| $E$ (Hartree)         | -984.90006 | -984.90114 | -984.89711 |
| $\Delta E$ (kcal/mol) | 0.68       | 0.00       | 2.53       |

ST5. Relative energies of three conformers of cation 5.

|                       | C1         | C2         | C3         |
|-----------------------|------------|------------|------------|
| $E$ (Hartree)         | -475.63690 | -475.63659 | -475.63658 |
| $\Delta E$ (kcal/mol) | 0.00       | 0.19       | 0.20       |

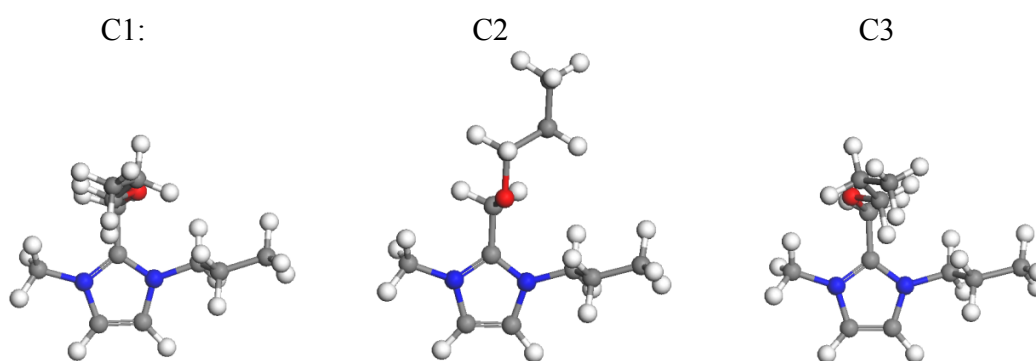

SF1: Three conformers of IL 1.

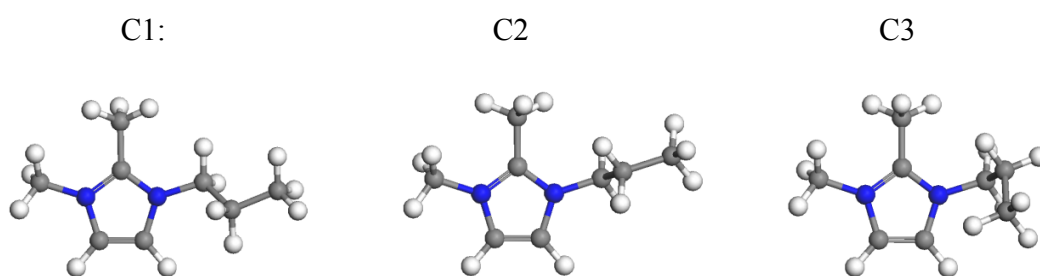

SF2: Three conformers of IL 2.

C1:

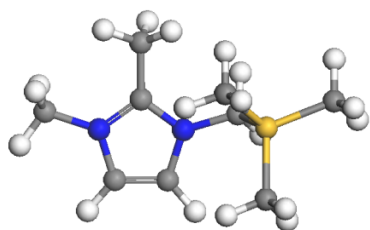

C2

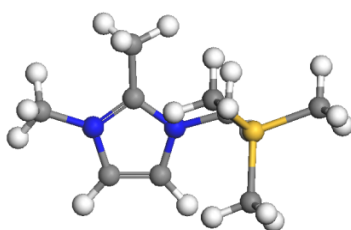

C3

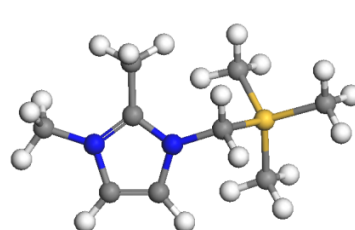

SF3: Three conformers of IL 3.

C1:

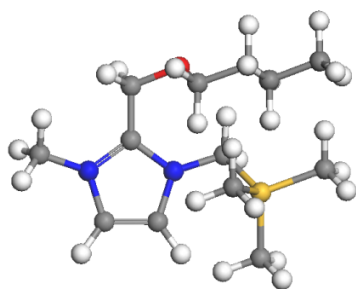

C2

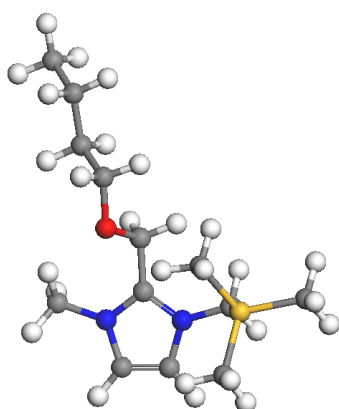

C3

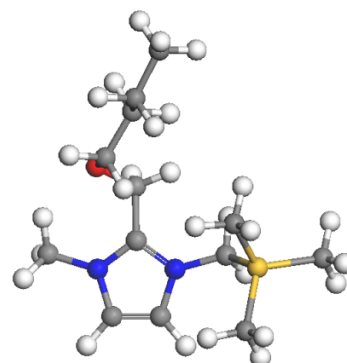

SF4: Three conformers of IL 4.

C1:

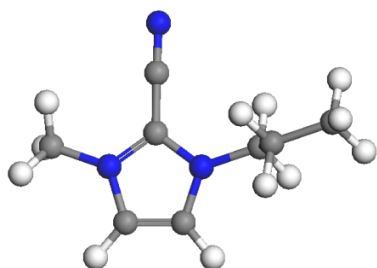

C2

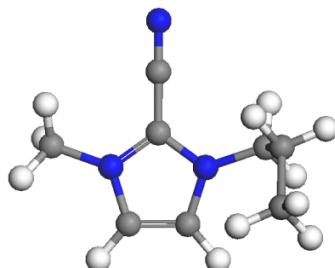

C3

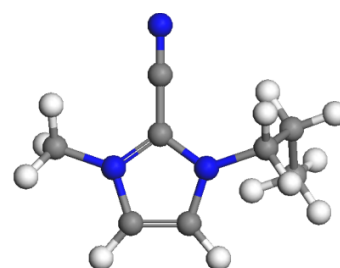

SF5: Three conformers of IL 5.
